RESEARCH ARTICLE

# The Genetic Analysis of an *Acinetobacter johnsonii* Clinical Strain Evidenced the Presence of Horizontal Genetic Transfer

Sabrina Montaña<sup>1</sup>, Sareda T. J. Schramm<sup>2</sup>, German Matías Traglia<sup>1</sup>, Kevin Chiem<sup>1,2</sup>, Gisela Parmeciano Di Noto<sup>1</sup>, Marisa Almuzara<sup>3</sup>, Claudia Barberis<sup>3</sup>, Carlos Vay<sup>3</sup>, Cecilia Quiroga<sup>1</sup>, Marcelo E. Tolmasky<sup>2</sup>, Andrés Iriarte<sup>4</sup>, María Soledad Ramírez<sup>1,2\*</sup>

**1** Instituto de Investigaciones en Microbiología y Parasitología Médica (IMPAM, UBA-CONICET), Buenos Aires, Argentina, **2** Department of Biological Science, California State University Fullerton, Fullerton, CA, United States of America, **3** Laboratorio de Bacteriología Clínica, Departamento de Bioquímica Clínica, Hospital de Clínicas José de San Martín, Facultad de Farmacia y Bioquímica, Buenos Aires, Argentina, **4** Departamento de Desarrollo Biotecnológico, Instituto de Higiene, Facultad de Medicina, UdelaR, Montevideo, Uruguay

\* [msramirez@fullerton.edu](mailto:msramirez@fullerton.edu)

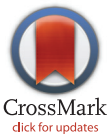

OPEN ACCESS

**Citation:** Montaña S, Schramm STJ, Traglia GM, Chiem K, Parmeciano Di Noto G, Almuzara M, et al. (2016) The Genetic Analysis of an *Acinetobacter johnsonii* Clinical Strain Evidenced the Presence of Horizontal Genetic Transfer. PLoS ONE 11(8): e0161528. doi:10.1371/journal.pone.0161528

**Editor:** Ruth Hall, University of Sydney, AUSTRALIA

**Received:** March 23, 2016

**Accepted:** August 8, 2016

**Published:** August 22, 2016

**Copyright:** © 2016 Montaña et al. This is an open access article distributed under the terms of the [Creative Commons Attribution License](https://creativecommons.org/licenses/by/4.0/), which permits unrestricted use, distribution, and reproduction in any medium, provided the original author and source are credited.

**Data Availability Statement:** This Whole Genome Shotgun project has been deposited at DDBJ/ENA/GenBank under the accession LVIB00000000. The version described in this paper is version LVIB01000000.

**Funding:** This work was supported by grants from the "Secretaría de Ciencia y Técnica de la Universidad de Buenos Aires" (UBACyT) and PICT 0120 to MSR, Buenos Aires, Argentina. MSR and CQ is a member of the CONICET research career and SM, GMT, and GPDN have a Doctoral Fellowship from CONICET. KC was supported by grant MHIRT 2T37MD001368 from the National Institute on

## Abstract

*Acinetobacter johnsonii* rarely causes human infections. While most *A. johnsonii* isolates are susceptible to virtually all antibiotics, strains harboring a variety of  $\beta$ -lactamases have recently been described. An *A. johnsonii* Aj2199 clinical strain recovered from a hospital in Buenos Aires produces PER-2 and OXA-58. We decided to delve into its genome by obtaining the whole genome sequence of the Aj2199 strain. Genome comparison studies on Aj2199 revealed 240 unique genes and a close relation to strain WJ10621, isolated from the urine of a patient in China. Genomic analysis showed evidence of horizontal genetic transfer (HGT) events. Forty-five insertion sequences and two intact prophages were found in addition to several resistance determinants such as *bla*<sub>PER-2</sub>, *bla*<sub>OXA-58</sub>, *bla*<sub>TEM-1</sub>, *strA*, *strB*, *ereA*, *sul1*, *aacC2* and a new variant of *bla*<sub>OXA-211</sub>, called *bla*<sub>OXA-498</sub>. In particular, *bla*<sub>PER-2</sub> and *bla*<sub>TEM-1</sub> are present within the typical contexts previously described in the *Enterobacteriaceae* family. These results suggest that *A. johnsonii* actively acquires exogenous DNA from other bacterial species and concomitantly becomes a reservoir of resistance genes.

## Introduction

Human infections caused by non- *A. baumannii* members of the *Acinetobacter* genus have been recently recognized due to the implementation of new technologies in clinical diagnostic laboratories [1–6]. Forty-seven distinctive *Acinetobacter* species with valid names have been described and more species are identified each year [7, 8]. *Acinetobacter johnsonii* is usually found in the environment and animals [9], it can occasionally colonize human skin [10] and cause clinical infections such as catheter-related bloodstream infections [11] or peritonitis associated with peritoneal dialysis [12].

Minority Health and Health Disparities, National Institute of Health. AI is a researcher from the Sistema Nacional de Investigadores (ANII), Uruguay.

**Competing Interests:** The authors have declared that no competing interests exist.

Although multidrug resistance has not been widespread among non-*baumannii* *Acinetobacter* species [13], *A. johnsonii* strains harboring a variety of  $\beta$ -lactamase genes are being isolated at different geographic locations [12–19]. One such isolate, recently described by Rodriguez et al., is strain (Aj2199) which produces PER-2 and OXA-58 [12]. These findings strongly suggest that *A. johnsonii* can acquire exogenous DNA as these genes were previously described in other bacterial genus and species. The detection of  $\beta$ -lactamase genes and other resistance determinants among *Acinetobacter* species demonstrates their potential to acquire and stably maintain resistance determinants.

In this study, we determined the complete genome sequence of the Aj2199 strain. The presence of a variety of traits like antibiotic resistance genes, insertion sequences, phage sequences, and numerous unique genes are indicative of active horizontal genetic transfer (HGT).

## Materials and Methods

### Whole-genome sequence of Aj2199 clinical strain

Genomic DNA was extracted using a MasterPure DNA Purification kit from Epicentre Biotechnologies. Whole-genome shotgun sequencing was performed using Illumina MiSeq- I, with Nextera XT libraries for sample preparation. De novo assembly was performed with SPADES assembler version 3.1.0 [14], using a pre-assembly approach with Velvet [15]. RAST server was used to predict open reading frames [16] and BLAST (version 2.0) software was utilized to confirm the predictions. tRNAscan-SE was used to predict tRNA genes [17]. This Whole Genome Shotgun project has been deposited at DDBJ/ENA/GenBank under the accession LVIB00000000. The version described in this paper is version LVIB01000000.

### Genome Sequences for comparative genomics

All available assemblies of *A. johnsonii* strains were downloaded from NCBI via ftp at [ftp.ncbi.nlm.nih.gov/genomes/ASSEMBLY\\_BACTERIA](ftp.ncbi.nlm.nih.gov/genomes/ASSEMBLY_BACTERIA). Other complete genomes, draft genomes and assemblies were also downloaded from NCBI via ftp and used for comparative studies. Up to three randomly selected genomes for each species were included in the analysis in order to avoid over-representation of some species. Reference genomes of the genus: *A. baumannii* AYE and *A. baumannii* ACICU were also analyzed (See S1 Table for the complete list of the 97 genomes sequences used in this work). Assemblies were annotated by means of RAST server [16] and the SEED source for genome annotations [18] with default parameters. GO ontology annotation was performed by means of HMM profile searches against bacterial EggNog 4.5 database [19] using HMMER 3.1 software, available at <http://hmmer.org/>.

### Clustering of homologous genes and phylogenetic analysis

Identification of homologous genes among the analyzed genomes was carried out using the OrthoMCL method [20] by means of the get homologous software [21]. Blastp searches were done with a minimum e-value of  $1.10^{-5}$ , a minimum identity value of 30% and minimum query coverage of 75%. 301 groups of putative orthologous sequences were identified among genomes of the family *Moraxellaceae* (Class: *Gammaproteobacteria*, Order: *Pseudomonadales*). Protein sequences alignments were done using Clustal Omega v1.2.0 [22]. Phylogenies were inferred using the maximum-likelihood method with an amino acid LG+G (8 categories) model by means of Phym1 version 3.1 [23] with 5 random starting trees. The default SH-like test was used to evaluate branch supports in each analysis [24]. Finally, a consensus tree was inferred from the 301 trees using the sumtrees.py script [25]. In the consensus tree, node support represents the number of phylogenies in which certain node appeared.

### Average nucleotide identity

Average nucleotide identity (ANI) between *A. johnsonii* Aj2199 and other closely related genomes (all *A. johnsonii* strains plus *A. lwoffii* WJ10621) was estimated. The ANI was used to delineate species using genome sequence data [26], two genomes displaying an ANI value equal or higher than 95% belong to the same species. Two-way ANI (reciprocal best hits based comparison) was estimated by means of the ani.rb script developed by Luis M. Rodriguez-R and available at [enveomics.blogspot.com](http://enveomics.blogspot.com).

### Genomic comparison, gene content and sequences analysis

Sequence analysis was carried out using BLAST (version 2.0) software (<http://www.ncbi.nlm.nih.gov/BLAST/>).

ARG-ANNOT and ISfinder softwares were used to identify antibiotic resistance genes and insertion sequences within the genome of Aj2199, respectively [27, 28]. Furthermore, phages and prophages prediction was done using PHAST (PHAge Search Tool) bioinformatic tool [29]. PlasmidFinder was used to detect the presence of *Enterobacteriaceae* plasmids [30]. plasmidSPAdes software, which distinguishes plasmid sequences via the read coverage of contigs, was also used [31].

Prediction of small non-coding RNAs was done using RNA families from the Rfam database and the software Infernal [32].

### Other bacterial strains

Four *A. johnsonii* strains (Aj205, Aj286, Aj289, Aj306) from the bacterial collection of the Hospital de Clínicas José de San Martín were included in the present study (Table 1). The four strains were identified as *A. johnsonii* by MALDI-TOF MS (Bruker Daltonik), *rpoB* amplification, and sequencing.

### General molecular techniques

Total DNA extraction was carried out using Wizard<sup>®</sup> Genomic DNA Purification Kit according to manufacturer instructions (Promega, Madison, WI). PCR reactions using the extracted DNA as template were carried out to determine the presence of resistance determinants (*bla*<sub>PER-2</sub>, *bla*<sub>OXA-58</sub>, *bla*<sub>TEM-1</sub>, *strA*, *strB*, *ereA*, *sul1*, *aacC2*) previously identified in Aj2199. The reactions were performed using the GoTaq enzyme according to manufacturer's instructions (Promega, Madison, USA). Plasmid extraction and *repAcil* gene amplification was carried out to search for the presence of the replicase gene of plasmids harboring *bla*<sub>OXA-58</sub> [33]. Plasmid DNA extraction was performed using the alkaline lysis method as described [34] with or

**Table 1. Other *Acinetobacter johnsonii* strains included in this study.**

| Strain | Year | Sample | MIC (mg/L) |      |      |     |     |     |       |     |     |       |      |     |
|--------|------|--------|------------|------|------|-----|-----|-----|-------|-----|-----|-------|------|-----|
|        |      |        | AMP        | SAM  | FOX  | CTX | CAZ | IMP | MEM   | AMK | GEN | CIP   | COL  | CEF |
| Aj306  | 2013 | Urine  | ≤2         | ≤2   | ≤4   | ≤1  | ≤1  | ≤1  | ≤0.25 | ≤2  | ≤1  | ≤0.25 | 2    | ≤1  |
| Aj289  | 2013 | BAL    | ≤2         | ≤2   | ≥ 64 | 4   | 4   | ≤1  | ≤0.25 | ≤2  | ≤1  | 0.5   | ≤0.5 | 4   |
| Aj286  | 2013 | Bone   | ≥ 32       | ≥ 32 | ≥ 64 | 4   | 2   | ≤1  | ≤0.25 | ≤2  | ≤1  | 0.5   | ≤0.5 | 4   |
| Aj205  | 2013 | Urine  | ≤2         | ≤2   | ND   | ≤1  | ≤1  | ≤1  | ≤0.25 | ≤2  | ≤1  | ND    | ≤0.5 | ≤1  |

BAL, bronchoalveolar lavage; AMP, ampicilin; SAM, ampicilin/sulbactam; FOX, cefoxitin; CTX, cefotaxime; CAZ, ceftazidime; IMP, imipenem; MEM, meropenem; AMK, amikacin; GEN, gentamicin; CIP, ciprofloxacin; COL, colistin; CEF, cefepime; ND, no determined.

doi:10.1371/journal.pone.0161528.t001

without further purification using the QIAfilter Midi prep Kit (QIAGEN, Hilden, Germany) according to the manufacturer's recommendations.

Conjugation assays were carried out to determine if *bla*<sub>TEM-1</sub> and *bla*<sub>PER-2</sub> are plasmid located. Briefly, Aj2199 and *E. coli* J53-2 cells grown with agitation in Luria Bertani (LB) broth were mixed (1:10 donor:recipient) and incubated for 18 h at 30°C. Transconjugants were selected on LB agar supplemented with sodium azide (100 µg/ml) and ampicillin (100 µg/ml). Transformation assays were carried out using as hosts competent *E. coli* TOP10 or the naturally competent *A. baumannii* A118 [35]. After transformation *E. coli* cells were plated on LB-agar containing ampicillin (100 µg/ml) or ceftazidime (4µg/ml). Transformation of *A. baumannii* A118 was carried out as previously described [35]. Briefly, fresh LB was inoculated with cells at late stationary phase followed by addition of 200 ng plasmid DNA and incubated for 1 hour at 37°C. Cells were then plated on LB-agar containing ceftazidime (4µg/ml). Electroporation was performed using the *A. baumannii* strains A118 and ATCC 17978, and *A. baylyi* ADP1 as described before [36]. Cells were plated on LB-agar containing ceftazidime (4µg/ml).

## Results

### Aj2199 genome sequence, features and comparative genomic analysis

The whole genome sequence of Aj2199 has a total of 1,167,708 high quality paired-end reads with an average insertion size of 514 bp [15]. 99.9% of the generated reads were mapped, resulting in mean nucleotide coverage of 65X (and a k-mer coverage of 29.9). Corrected reads show an average length of 251 bp. 155 contigs larger than 500 bp were assembled, comprising 3,803,969 bp. The draft genome has a N50 contig size of 70,198 bp with a maximum contig length of 286,583 bp and a G+C content of 41.4%. A total of 3,737 open reading frames were predicted using the RAST server [16]. Using tRNAscan-SE, a total of 114 tRNA genes were identified [17] (Table 2).

We performed a genome comparison between Aj2199 and 79 *Acinetobacter* genomes available in the GenBank and identified 36,414 homologous gene families. The data could be interpreted as a rough estimation of the pangenome of *Acinetobacter*. Minimum values of 30% amino acid identity and 75% coverage was set for grouping genes in homologous families. Among the analyzed genomes, a total of 1,442 gene families were predicted as unique to *A. johnsonii* strains (S2 Table), including Aj2199. Homologous identification suggests that more than 63% of the gene families exclusively found in *A. johnsonii* are strain-specific, which means that they are only found in one genome. On the other hand, only nine gene families are conserved among the strains and not found in any other analyzed *Acinetobacter* genome. These nine gene families may represent a molecular signature of the species (S2 Table). There are 227 gene families comprised of 240 genes distributed within 84 contigs, that are exclusively found

**Table 2. General features of the *A. johnsonii* Aj2199 genome.**

| Features                            | Chromosome |
|-------------------------------------|------------|
| Total number of base pairs          | 3,803,969  |
| G+C content (%)                     | 41.4%      |
| Number of possible ORFs             | 3,737      |
| Number of tRNA genes                | 114        |
| Number of Insertion Sequences (ISs) | 45         |
| Number of prophages                 | 4          |

Prophages include partial and complete sequences.

doi:10.1371/journal.pone.0161528.t002

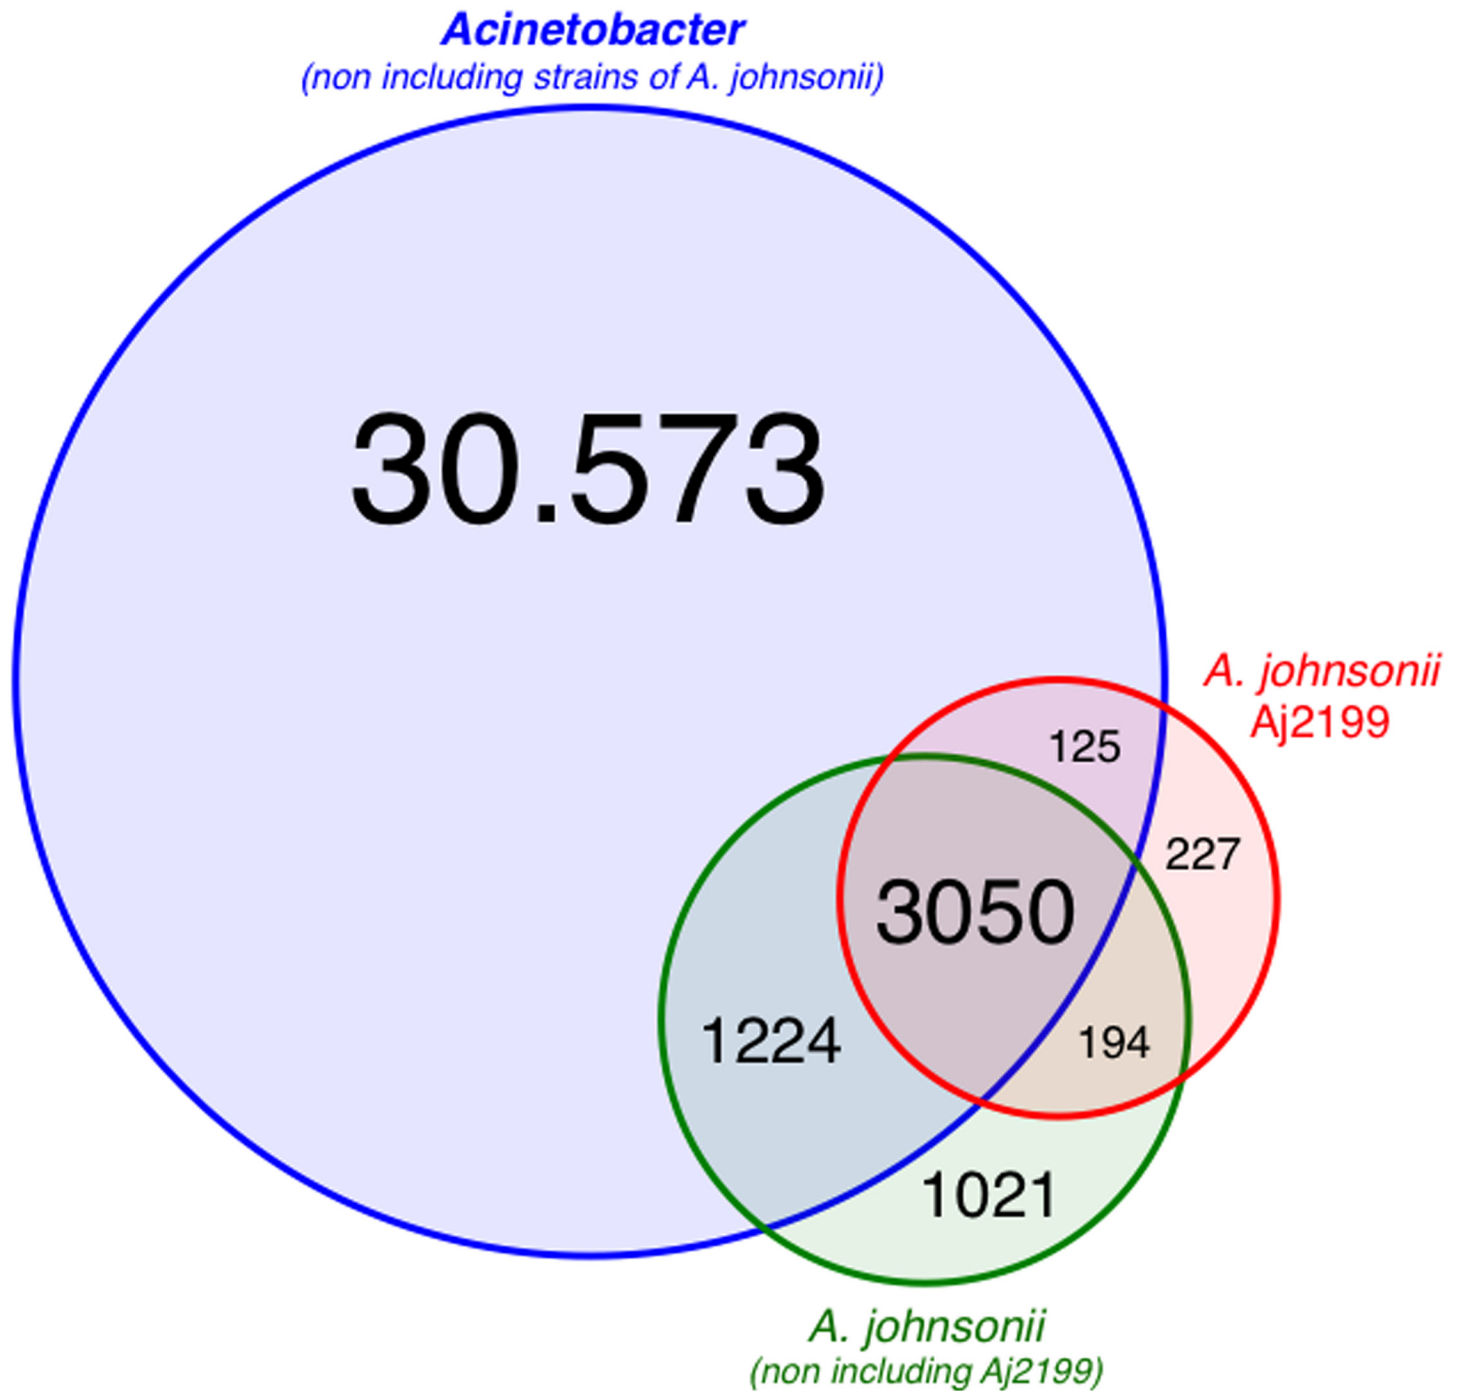

**Fig 1. Comparative analysis of the gene families found within the 79 *Acinetobacter* genomes.** Venn diagram representing: i) shown in blue is the number of gene families found in the pangenome of *Acinetobacter*, except *A. johnsonii* strains, ii) green corresponds to the pangenome of *A. johnsonii*, except *Aj2199* strain, and iii) in red all gene families found in *Aj2199* genome are shown.

doi:10.1371/journal.pone.0161528.g001

in strain *Aj2199* (Fig 1). 161 genes were annotated as hypothetical proteins and 24 as mobile elements. Among the other 55 unique genes in *Aj2199* we found genes coding for antibiotic resistance determinants, DNA binding and integration proteins, integral component of membrane, transferases, and phage proteins (S2 Table). Some genes coding for proteins related to

ion transport and regulation were found in this genome. Interestingly, genes coding for resistance to toxic metal ions were also found. Finally an aquaporin protein coding gene (homologous to *aqpZ*), two pilus biogenesis proteins (PilO-M) and two glutathione S-transferases (EC: 2.5.1.18), among others were also present (S2 Table).

Assembled contigs, comprising 246.615bp, were predicted as putative plasmid sequences by plasmidSPAdes software [31]. These sequences were re-annotated resulting in 225 coding sequences. All of them were already annotated as part of the Aj2199 genome. Among them we found seven genes that are part of toxin-antitoxin systems, six genes part of restriction modification systems, ParA and ParB partitioning proteins, at least 20 metal resistance genes and four cation transporters (S3 Table). Note that any of the antibiotic resistance genes described in this work were predicted to be located in plasmids according to the plasmidSPAdes prediction. The role and functional implications of these genes will be further investigated in the future.

Further analysis of the genomes revealed the presence of 301 orthologs among 98 complete selected genomes of the *Moraxellaceae* family, 97 from the NCBI database plus Aj2199 (S1 Table) that were used for phylogenetic analysis. The 301 orthologous sets were aligned and then a Maximum Likelihood phylogenetic tree was built for each alignment. The 301 phylograms, considering nodes with significant statistical support (SH-like test > 50%), were merged into a consensus tree shown in Fig 2. The resulting phylogeny clustered Aj2199 with *A. johnsonii* strains with 82% node support, which indicates that the node appears in 82% of the total phylograms. We found that the WJ10621 strain, reclassified as *A. johnsonii* considering the whole genome comparison, is the closest strain to Aj2199. The two-way average nucleotide identity (ANI) among closely related strains strongly supported the phylogenetic results and the 16S *rDNA* sequence analysis. The ANI between Aj2199, WJ10621 and the other *A. johnsonii* strains was above 96% (S4 Table). In summary, the estimated two-way ANI values suggest that all the *A. johnsonii* genomes grouped as a monophyletic cluster belong to the same species, which is comprised of SH046, ANC\_3681, TG19625, CIP64.6, TG19605, DSM\_6963, MB44, XBB1, Aj2199 and also WJ10621.

### Genetic context and description of a new variant of *bla*<sub>OXA-211</sub> in *A. johnsonii*

As was previously reported by Perichon *et al* 2014, OXA-like genes were found frequently in *Acinetobacter* species. In *A. johnsonii* three variant of *bla*<sub>OXA-211</sub>, so called *bla*<sub>OXA-211</sub>, *bla*<sub>OXA-280</sub> and *bla*<sub>OXA-281</sub>, were described [37].

The genome of Aj2199 contains a new variant of the chromosomally encoded oxacillinase OXA-211 possessing 10 amino acid substitutions compared to the formerly defined OXA-211 (GenBank accession number AEV91550). This *bla*<sub>OXA</sub>, now called *bla*<sub>OXA-498</sub>, has a 95% nucleotide identity to previously described OXA genes, such as *bla*<sub>OXA-211</sub> (GenBank accession number KF453234), *bla*<sub>OXA-212</sub> (GenBank accession number JN861780), and *bla*<sub>OXA-309</sub> (GenBank accession number HF947514), all of which are found in *A. johnsonii* strains. Furthermore, *bla*<sub>OXA-498</sub> has up to a 96% identity with other *bla*<sub>OXA-211</sub> variants such as those in *A. johnsonii* strains CIP 64.6 (GenBank accession number APON01000041) and ANC 3681 (GenBank accession number APPZ01000001). A comparison using BLAST between OXA sequences of other *Acinetobacter* species shows that *bla*<sub>OXA-498</sub> has up to a 72% identity, which indicate that these OXA variants are unique to *A. johnsonii*. Located upstream of *bla*<sub>OXA-498</sub> in Aj2199, we found *dnaK*, *grpE*, hypothetical protein (HP) gene, *tolA* and *estA* genes. Among the identified genes, *dnaK*, *grpE*, and *estA* are responsible for the coding of a chaperone, co-chaperone, and esterase A protein, respectively. A similar genetic context lacking the presence of an upstream OXA gene was described in other *Acinetobacter* sp. (GenBank accession numbers CP003847, CP002080, CP002177).

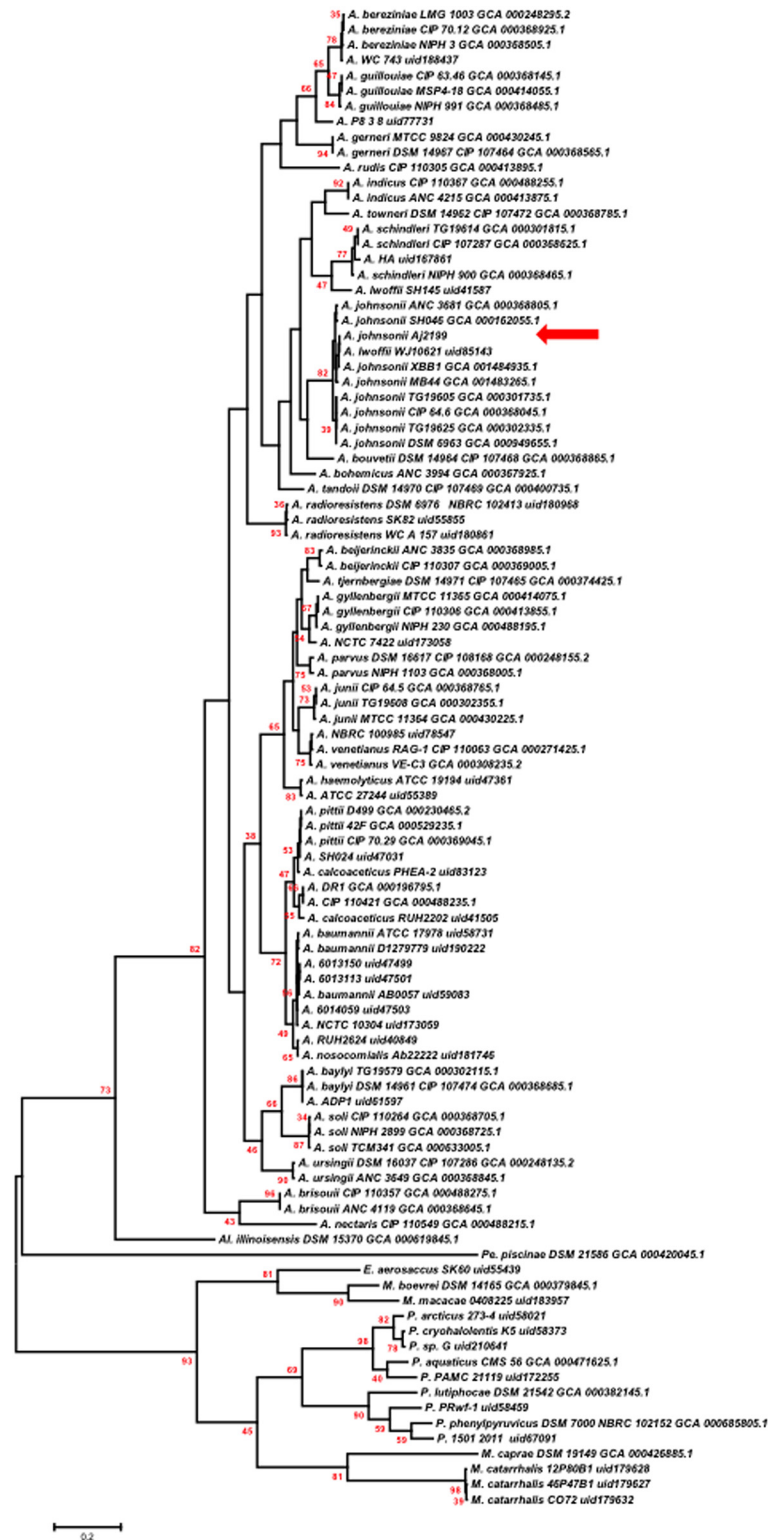

**Fig 2. Consensus phylogenetic tree obtained for 98 complete genomes of the *Moraxellaceae* family plus Aj2199 strain.** Phylogenetic trees were inferred for 301 orthologous protein sequences using the maximum-likelihood method with an amino acid LG+G model. The default SH-like test was used to evaluate branch supports in each case. The consensus tree was inferred from the 301 phylograms, considering only nodes equal or above 50%. Note that node values represent the number of orthologous protein analysis that

support a certain group and that node support values below 33% are not shown in the Fig The tree was arbitrarily rooted using the mid-point rooting method. A red arrow indicates the position of Aj2199 strain in the tree. In the phylogeny A. indicates *Acinetobacter*, M. indicates *Moraxella*, E. indicates *Enhydrobacter*, P. indicates *Psychrobacter*, Al. indicates *Alkanindiges* and Pe. Indicates *Perluclidibaca* genus.

doi:10.1371/journal.pone.0161528.g002

The genetic context of OXA variants was conserved among all *A. johnsonii* strains (Fig 3). The region between *grpE* and *estA*, containing HP and *tolA*, is only conserved in *A. johnsonii*. Moreover, from our analysis, we observed *dnaK* with 75% identity in *Moraxella catarrhalis* BBH18 strain. However, *grpE* present in *M. catarrhalis* BBH18 did not show any significant similarities to those found in *A. johnsonii* strains.

A hypothetical protein (HP, shown in black in Fig 3), located downstream of *bla*<sub>OXA-498</sub> is conserved in multiple *Acinetobacter* species. Farther downstream of *bla*<sub>OXA-498</sub>, we found *erpA* and three different *adeT* genes, followed by *yheS*. The genetic context between *yheS* and the conserved HP is larger in other *Acinetobacter* sp. (ranging from 28.1 kbp to 29.7 kbp) compared to Aj2199 (3.9 kbp). The *yheS* gene is reversely oriented in *Acinetobacter* sp. DR1 compared to Aj2199 (Fig 3).

This analysis showed that the genes located upstream and downstream of *bla*<sub>OXA-211</sub> and variants are conserved among *A. johnsonii* strains indicating the ubiquity of the gene.

### Resistance determinants present in Aj2199 and their genetic contexts supports the occurrence of HGT

To determine the repertoire of resistance genes present in Aj2199 genome we have used ARG-ANNOT database to predict them. A total of ten resistance gene sequences, excluding *bla*<sub>OXA-498</sub>, were identified. Among them we found genes encoding for β-lactamases (*bla*<sub>PER-2</sub>, *bla*<sub>OXA-58</sub> and *bla*<sub>TEM-1</sub>), aminoglycoside modification enzymes (*strA*, *strB* and *aacC2*), sulfonamide-resistant dihydropteroate synthase (*sulI*), erythromycin esterase (*ereA*) and macrolide efflux protein and phosphotranferase (*msrE* and *mphE*).

In order to analyze the organization and context of the β-lactamase genes, in-depth analysis of the genome sequences of Aj2199 was performed.

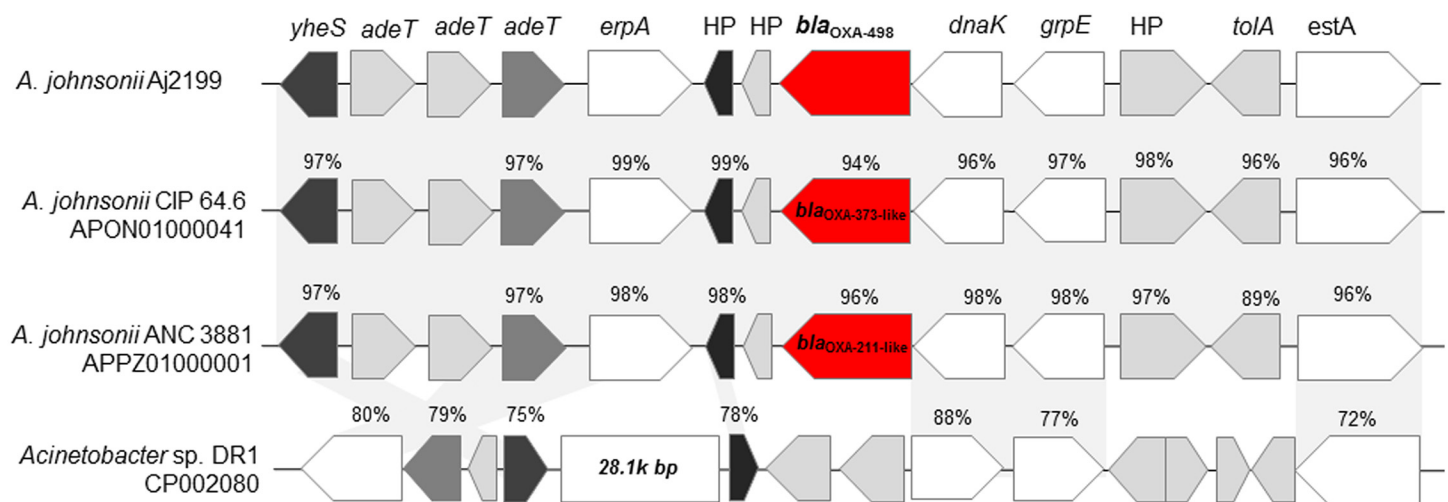

Fig 3. Genetic context of a new variant of *bla*<sub>OXA-211</sub> in Aj2199. Analysis of the genetic context of *bla*<sub>OXA-211</sub> and its variants.

doi:10.1371/journal.pone.0161528.g003



### Analysis of *bla*<sub>OXA-58</sub> genetic context

The *bla*<sub>OXA-58</sub> genomic context analysis showed the presence of a truncated *ISAb*<sub>3</sub> upstream of the gene and a complete *ISAb*<sub>3</sub> downstream of it (Fig 4A). The  $\Delta$ *ISAb*<sub>3</sub> located upstream (5' end) has lost the right inverted repeat (IR-R). The presence of truncated versions of *ISAb*<sub>3</sub> in the 5' end of the *bla*<sub>OXA-58</sub> gene were previously described by others showing that in some cases *ISAb*<sub>3</sub> is interrupted by another IS, such as *ISAb*<sub>2</sub> [38, 39] (Fig 4A). The genetic context downstream (3' end) *bla*<sub>OXA-58</sub> resembles the genetic structure previously described in *A. baumannii* strains and in the *A. nosocomialis* AG13TU119 strain [40] [39], where *ISAb*<sub>3</sub> is followed by *araC1* and *lysE*. In contrast, the region flanking the 5' end of the *bla*<sub>OXA-58</sub> was not previously described. Directly upstream  $\Delta$ *ISAb*<sub>3</sub>-*bla*<sub>OXA-58</sub> we found a hypothetical protein (HP) with 86% of identity to another HP described only in *Dendroctonus ponderosae*

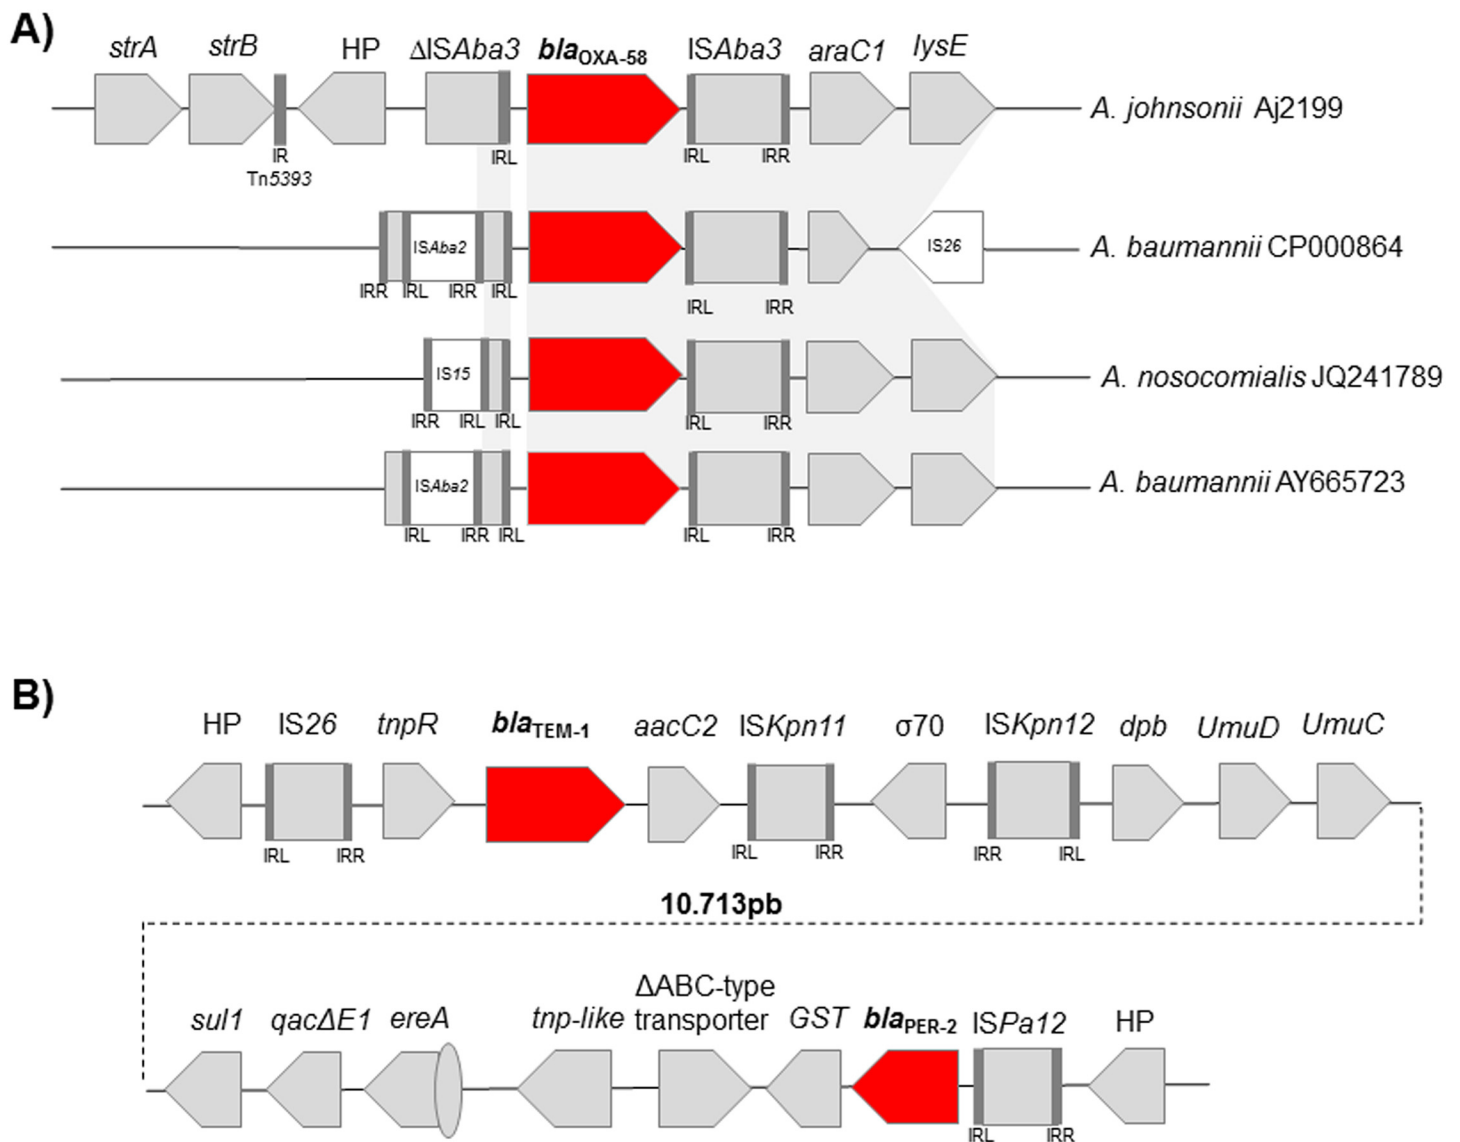

**Fig 4. Resistance determinants present in Aj2199 and corresponding genetic contexts supports the occurrence of HGT.** (A) Analysis of *bla*<sub>OXA-58</sub> genetic context compared to other *bla*<sub>OXA-58</sub> genetic contexts described. (B) Schematic representation of *bla*<sub>PER-2</sub> and *bla*<sub>TEM-1</sub> flanking regions.

doi:10.1371/journal.pone.0161528.g004

(GenBank accession number APGK01000113) and two streptomycin resistance determinants, *strB* and *strA*, are preceding it (Fig 4A). This region containing *strB* and *strA* is derived from Tn5393 [41] and was previously described in some species such as *Erwinia amylovora*, *A. baumannii*, *Escherichia coli*, *Pseudomonas aeruginosa* (GenBank accession numbers M96392, CP010779, CP010373 and KP975076, respectively).

A blast analysis was performed and it showed that 62 *bla*<sub>OXA-58</sub> sequences are available in the GenBank. However, the genetic context of *bla*<sub>OXA-58</sub> was only described in 36 out of the 62 deposited sequences. Within the 36 descriptions, at least one copy of *ISAb<sub>a</sub>3* was associated to *bla*<sub>OXA-58</sub> in the in the 5' or 3' end of the gene. The association of *bla*<sub>OXA-58</sub> with *ISAb<sub>a</sub>3* seems to be a stable and successful platform for this carbapenemase.

Other genetic contexts, some of them described in plasmid, have been reported in the literature, e.g. the association of *bla*<sub>OXA-58</sub> with a *ISAb<sub>a</sub>825*, *ISAb<sub>a</sub>2* and *IS18* upstream of *bla*<sub>OXA-58</sub> [38, 39, 42–44].

A new genetic environment flanking the upstream (5' end) region of the  $\Delta$ *ISAb<sub>a</sub>3* was found in Aj2199 genome suggesting the acquisition of this gene from at least two different species.

### Genetic context analysis of *bla*<sub>PER-2</sub> and *bla*<sub>TEM-1</sub> exhibits the presence of foreign DNA acquisition

We analyzed the genetic context of *bla*<sub>TEM-1</sub> in Aj2199 and found that *bla*<sub>TEM-1</sub> is embedded in a truncated version of Tn3, in which the *tnpA* gene is absent and the *tnpR* gene is complete and shared 94%, 100% and 95% of identity to the previously *tnpR* described in the Tn1, Tn2 and Tn3 transposons, respectively [45]. Located downstream *bla*<sub>TEM-1</sub> is *aacC2*, which has been shown to confer resistance to gentamicin (Fig 4B). The analysis of the contig (named contig\_8) harboring *bla*<sub>TEM-1</sub> demonstrated it was 24,769 bp away (from the 3' end of the *bla*<sub>TEM-1</sub> until the 3' end of *bla*<sub>PER-2</sub>) from another important  $\beta$ -lactamases *bla*<sub>PER-2</sub>. Some of the genes located in the region between *bla*<sub>TEM-1</sub> and *bla*<sub>PER-2</sub> were previously described in the context of genomic islands (*umuC* and *umuD* genes) [46, 47], or in plasmids as the genes present in the Tn21 mer operon [48].

Our analysis of the *bla*<sub>TEM-1</sub> genetic context showed 99% identity to a previously described genetic context in *Klebsiella pneumoniae* (GenBank accession number LM994717). A complete *IS26* was located upstream of *tnpR* and preceded by HP that shared 97% identity with a HP described in an *A. pittii* (GenBank accession number WP\_044100499) (Fig 4B).

Furthermore, the analysis of the genetic context of *bla*<sub>PER-2</sub> showed that this gene was flanked by a complete *ISPa12* upstream and a glutathione S-transferase downstream (Fig 4B). The association of this later gene with *bla*<sub>PER-2</sub> was previously described in *Citrobacter freundii* (GenBank accession number AM409516) [49]. Preceding *ISPa12* was a HP with 34% identity to a HP described in *Paraglaciecola polaris* (GenBank accession number WP\_007103537). Moreover, a *top*-like gene with 97% identity to a transposase reported in *Methylophaga frap-pieri*—a bacteria typically isolated from marine environments or brackish waters—(GenBank accession number CP003380), was found 1,422 bp downstream of *bla*<sub>PER-2</sub>. This particular transposase was also identified in *Klebsiella oxytoca* (GenBank accession number CP003684) and *Vibrio salmonicida* (GenBank accession number AJ289135). Downstream this transposase in Aj2199 was a region containing a complete gene cassette (*ereA*), *qacE $\Delta$ 1*, and *sul1*. The analysis of *bla*<sub>TEM-1</sub> and *bla*<sub>PER-2</sub> in Aj2199 indicates the occurrence of different recombination events. There was a great degree of mosaicism, suggesting an ability to acquire exogenous DNA from different species as well as exposing a high degree of genomic plasticity.

Since *bla*<sub>TEM-1</sub> and *bla*<sub>PER-2</sub> have been found to be located within plasmids or chromosomes [49–53], we performed various plasmid extraction techniques and used the products in

transformation assays of competent *E. coli*, *A. baumannii* and *A. baylyi* cells. In addition, we carried out conjugation assays using different bacteria as host cells. Resistance could not be detected in any of the assays suggesting that *bla*<sub>TEM-1</sub> and *bla*<sub>PER-2</sub> are likely chromosomally located. Moreover, using a bioinformatic approach we searched for *Enterobacteriaceae* plasmid replicon sequences ( $n = 116$ ) [30] and obtained negative results. In addition, as noted above, neither of these genes are included within the contigs predicted to be part of plasmid structures by the plasmidSpades software. Also, the *repAcil* PCR amplification gave negative results. In summary, although not definitive, the available evidence suggest that *bla*<sub>TEM-1</sub> and *bla*<sub>PER-2</sub> are not plasmid-mediated.

## Identification of potential prophages and phage sequences in Aj2199 genome

Using PHAST tool to predict phage sequences, we identified two intact prophages, a questionable prophage and an incomplete prophage in the Aj2199 genome.

One of the intact prophages contained 50,055 bp and a G+C content of 41.46% with 61 predicted open reading frames. This prophage has the corresponding *attL* (TATACAATGATTTTAG) and *attR* (TATACAATGATTTTAG) recognition sites. The phage integrase had a 99% identity with an integrase described in the genome of *A. johnsonii* (GenBank accession number WP\_035326457) and an 83% identity with an integrase found in *A. bereziniae* genome (GenBank accession number WP\_005029089). The genes required for the head, capsid, tail tape, tail fiber as well as the tail assembly protein encoding genes were present.

The second intact prophage contained 22,820 bp a G+C content of 43% with 29 predicted open reading frames. The genes encoding for putative head, capsid, tail tape and tail fiber were present. However, the *attL* and *attR* recognition sites as well as the integrase-encoding gene were not found.

Furthermore, a questionable prophage (24,313 bp), for which only phage proteins and transposases were recognized by PHAST, was identified.

The incomplete predicted prophage, composed of 21,414 bp, possessed 39 predicted open reading frames including the phage integrase, which had a 100% identity with an integrase in the *A. johnsonii* SH046 (GenBank accession number EEY97814). The *attL* (ATATCTAAGCAT) and *attR* (ATATCTAAGCAT) recognition sites were also present. The analyses of non-phage genes into the predicted prophage showed the presence of putative transposases and genes with unknown functions.

In agreement with previous published results, our findings revealed the presence of phage related sequences in the Aj2199 genome [54].

## Identification of insertion sequence elements in Aj2199 genome

The Aj2199 genome contains a large variety of insertion sequence (IS) elements, which reinforces the theory of extensive acquisition events of mobile genetic elements (MGEs) in this strain. A total of 19 complete ISs and 26 partial ISs were identified (Table 3). As was observed for other *Acinetobacter* sp., the most abundant IS elements within Aj2199 are IS*Aba*-like. Multiple copies of complete IS*Aba12* ( $n = 6$ ), IS*Aba19* ( $n = 2$ ), and IS*Aba8* ( $n = 2$ ) were present in the genome. Furthermore, multiple copies of truncated ISs were found, including five copies of  $\Delta$ IS*Aba19* and five copies of  $\Delta$ IS*Aba11*. The IS*Aba12* and IS*Aba19*, in their complete and truncated versions, were the most abundant IS within Aj2199 genome. IS*Aba12* was found downstream or upstream of different genes in all instances. Genes found upstream of IS*Aba12* were involved in the synthesis of lipid A, which is known to be an activator of monocytes triggering a proinflammatory response and is recognized as a Toll-like receptor 4, TLR4 [55, 56].

**Table 3. Insertion sequences identified in *A. johnsonii* Aj2199 genome.**

| Insertion sequences  | Origin                        | Complete/partial sequences | Amount |
|----------------------|-------------------------------|----------------------------|--------|
| IS26                 | <i>Proteus vulgaris</i>       | 1/0                        | 1      |
| ISAb <sub>a</sub> 2  | <i>A. baumannii</i>           | 0/1                        | 1      |
| ISAb <sub>a</sub> 3  | <i>A. baumannii</i>           | 1/1                        | 2      |
| ISAb <sub>a</sub> 5  | <i>A. baumannii</i>           | 0/1                        | 1      |
| ISAb <sub>a</sub> 7  | <i>A. baumannii</i>           | 0/1                        | 1      |
| ISAb <sub>a</sub> 8  | <i>A. baumannii</i>           | 2/0                        | 2      |
| ISAb <sub>a</sub> 11 | <i>A. baumannii</i>           | 0/5                        | 5      |
| ISAb <sub>a</sub> 12 | <i>A. baumannii</i>           | 6/4                        | 10     |
| ISAb <sub>a</sub> 14 | <i>A. baumannii</i>           | 1/0                        | 1      |
| ISAb <sub>a</sub> 19 | <i>A. baumannii</i>           | 2/5                        | 7      |
| ISAb <sub>a</sub> 21 | <i>A. baumannii</i>           | 0/1                        | 1      |
| ISAb <sub>a</sub> 25 | <i>A. baumannii</i>           | 0/1                        | 1      |
| ISAb <sub>a</sub> 31 | <i>A. baumannii</i>           | 0/1                        | 1      |
| ISAh <sub>a</sub> 2  | <i>A. haemolyticus</i>        | 1/0                        | 1      |
| ISAj <sub>o</sub> 1  | <i>A. johnsonii</i>           | 1/0                        | 1      |
| ISAj <sub>o</sub> 2  | <i>A. johnsonii</i>           | 0/1                        | 1      |
| ISK <sub>pn</sub> 11 | <i>Klebsiella pneumoniae</i>  | 1/0                        | 1      |
| ISK <sub>pn</sub> 12 | <i>Klebsiella pneumoniae</i>  | 1/0                        | 1      |
| ISK <sub>pn</sub> 18 | <i>Klebsiella pneumoniae</i>  | 0/1                        | 1      |
| ISOur1               | <i>Oligella urethralis</i>    | 1/0                        | 1      |
| ISPa12               | <i>Pseudomonas aeruginosa</i> | 1/0                        | 1      |
| ISPa14               | <i>Pseudomonas aeruginosa</i> | 0/1                        | 1      |
| ISPst3               | <i>Pseudomonas stutzeri</i>   | 0/1                        | 1      |
| ISSwi1               | <i>Salmonella enterica</i>    | 0/1                        | 1      |

doi:10.1371/journal.pone.0161528.t003

A copy of ISAb<sub>a</sub>12 was found downstream of Ton-B dependent receptor gene, which codes for bacterial outer membrane proteins that transports siderophores, vitamin B12, nickel complexes, and carbohydrates [57]. We also observed other copies of ISAb<sub>a</sub>12 in different genetic context, e.g. near to hypothetical proteins or putative genes related to zinc metabolism or UV radiation resistance.

Additionally, IS elements previously described in *K. pneumoniae* such as ISK<sub>pn</sub>11, ISK<sub>pn</sub>12 and ISK<sub>pn</sub>18 were identified. ISK<sub>pn</sub>11 and ISK<sub>pn</sub>12 were found flanking the RNA polymerase  $\sigma^{70}$  factor (*rpoD*), which may allow for the movement of *rpoD* within the genome as well to be transferred to another bacterial cell. This  $\sigma^{70}$  factor was also described in plasmids and in the chromosome of many other species, such as *K. pneumoniae*, *A. baumannii*, *E. coli*, *Serratia marcescens* and *Shigella sonnei* [58].

ISOur1 was also found in Aj2199 genome. This IS, which has been previously reported as a strong promoter when localized upstream of *ampC* in *Oligella urethralis* [59], is found upstream of a putative gene belonging to an UvrABC system.

The present data exposed the importance of ISs in modeling Aj2199 genome and its ability to acquire and later recombine exogenous DNA within its genome.

### Presence of putative RNA regulators in Aj2199 genome

*In-silico* prediction of putative regulatory RNAs, including small RNA, antisense RNA, thermoregulators, riboswitches and cis-regulators, as well as other small non-coding RNA involved

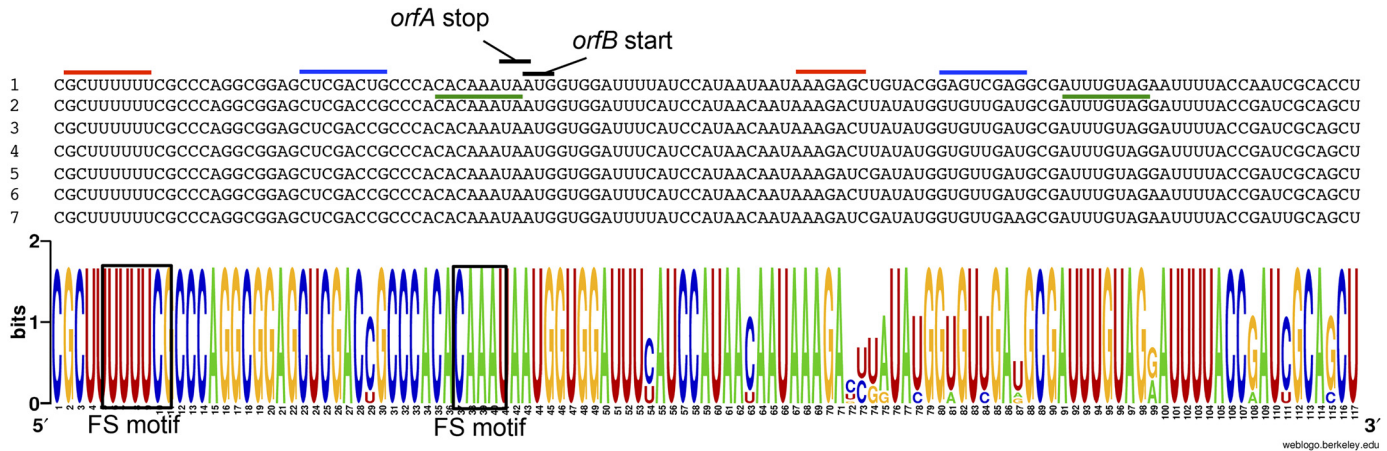

**Fig 5. Conserved sequence of ALIL-pseudoknot associated to ISAb insertion sequences.** Sequences involved in the predicted RNA secondary structure are indicated with red and blue lines. Putative pseudoknot pairing is indicated with green lines. Frame-shift motifs are marked with black squares.

doi:10.1371/journal.pone.0161528.g005

in cellular processes, such as CRISPRs and antitoxins was assessed in the Aj2199 genome. To perform the search we used 720 covariance models resulting in 66 potential candidates. Among them, twenty-eight showed significant e-values corresponding to four riboswitches (families FMN, TPP, cobalamin, glycine), one thermoregulator (CspA), 13 sRNA (CsrC, MicC, t44, RsmZ, RsmY, IsrG, IsrK, SraL, rli40, STnc40, STnc370, Aar, sau-50, Atu\_C9), one asRNA (C4) and four cisRNA (yybP-ykoY, Alpha\_RBS, ykkC-yxkD, ALIL pseudoknot). While most of these candidates have previously been studied [60, 61], the role of many such as the apical loop-internal loop RNA (ALIL) pseudoknot is still unclear and poorly understood, and thus was further analyzed in this study. In particular, the apical loop-internal loop RNA (ALIL) pseudoknot, was further analyzed. This RNA is directly involved in the stimulation of transposition in IS3-like elements [62]. RNA prediction of ALIL pseudoknot retrieved seven positive sequences that were located within an IS (Fig 5). Five of them were part of an ISAb19 and the remaining pseudoknots were found in ISAb2. Sequence analysis of the pseudoknot sequences showed a highly conserved sequence with two main palindromic regions that are marked with red and blue lines in Fig 5. In Fig 5 the base pairing interaction involved in the pseudoknot was marked with green lines. Noteworthy, ISAb19 was the second most predominant after ISAb12 within Aj2199 genome. The role of the ALIL regulatory RNA in *A. johnsonii* in the activity of ISAb19 will be studied in future studies.

Our analysis exposed a wide variety of regulatory elements in Aj2199 genome. The presence of several MGEs and RNA regulators within this genome suggests a potential contribution of MGEs in the mobilization of RNA elements that have an impact on genome evolution and bacteria adaptation.

### Dispersion of resistance determinants in other *A. johnsonii* clinical strains

In order to determine if other *A. johnsonii* isolates recovered from the same hospital harbored some of the resistance determinants present in Aj2199, we tested four *A. johnsonii* strains (Aj205, Aj286, Aj289, Aj306) (Table 1). Among the tested isolates Aj286 and Aj289 were resistant to FOX. Moreover, Aj286 was resistant to AMP and SAM. The other two isolates, Aj205

and Aj306, were susceptible to all antibiotics tested (Table 1). PCR amplification for *bla*<sub>PER-2</sub>, *bla*<sub>OXA-58</sub>, *bla*<sub>TEM-1</sub>, *strA*, *strB*, *ereA*, *sul1*, and *aacC2* were performed. Positive amplification results were only obtained for *strA* and *strB* in Aj289, Aj286, and Aj306.

## Discussion

In the last few years, the increase of antibiotic resistant bacteria has posed a serious threat to human health. The recoveries of species not previously recognized as a menace in the hospital environment have been widely reported [63–65].

In the present study we have delved into the genome of a multidrug-resistant *A. johnsonii* strain (Aj2199) that was recovered from a hospital in Buenos Aires and it exhibited the occurrence of resistance genes previously reported in other species. By the implementation of different bioinformatics tools, we analyzed in depth its genome to identify particular features and the presence of HGT events within it.

A wide variety of MGEs and traces of HGT were identified in Aj2199. These results are in accordance with previous studies that reported great number of MGEs in *Acinetobacter* genomes [42, 54, 66–69]. Ten resistance genes (*bla*<sub>PER-2</sub>, *bla*<sub>OXA-58</sub>, *bla*<sub>TEM-1</sub>, *strA*, *strB*, *ereA*, *sul1*, *aacC2*, *msrE* and *mphE*) were identified demonstrating the potential of other non-*baumannii* *Acinetobacter* species to evolve towards the development of high levels of antibiotic resistance. Moreover, a new variant of *bla*<sub>OXA-211</sub>, called *bla*<sub>OXA-498</sub>, was also identified reinforcing the idea that some *Acinetobacter* sp. harbor a chromosomally encoded oxacillinase. *bla*<sub>OXA-498</sub> has up to 72% amino acid identity with other oxacillinases described in *Acinetobacter* species. This supports the uniqueness of the OXA variant to *A. johnsonii*.

Regarding other relevant  $\beta$ -lactamases present in Aj2199 genome, analysis of *bla*<sub>PER-2</sub> and *bla*<sub>TEM-1</sub> genetic contexts revealed a great degree of mosaicism evidencing its ability to acquire exogenous DNA from different species as well as exposing a high degree of genomic plasticity. The presence of genetic contexts previously described in the *Enterobacteriaceae* family supported the occurrence of DNA exchange within them. The analysis of *bla*<sub>OXA-58</sub> genetic environment exposed that the flanking region upstream (5' end) the  $\Delta$ IS<sub>Aba3</sub> was novel. The 3' end resembled the genetic environment previously described in other *Acinetobacter* strains [40] [39].

The results obtained here showed that *bla*<sub>OXA-58</sub>, *bla*<sub>PER-2</sub>, and *bla*<sub>TEM-1</sub> are likely chromosomally located. This differs from a recent study where the presence of different  $\beta$ -lactamase genes, such as *bla*<sub>NDM-1</sub>, *bla*<sub>OXA-58</sub> and *bla*<sub>PER-1</sub>, were plasmid located [50].

The role of IS in the development of antibiotic resistance and genome plasticity in *A. baumannii* strains has been extensively mentioned in the literature [69, 70]. However, the role, quantity, and identity of ISs in other species have been poorly studied. In the Aj2199 genome a large number of complete or partial IS were found. A total of 45 IS-related sequences belonging to different families were identified.

IS elements previously described in *K. pneumoniae* such as IS<sub>Kpn11</sub>, IS<sub>Kpn12</sub> and IS<sub>Kpn18</sub> were identified, which reinforces the idea of extensive acquisition of mobile genetic elements and the importance of ISs in modeling Aj2199 genome and its ability to acquire and later recombine exogenous DNA within its genome.

Different phages, prophages and phage related proteins have been found in *A. baumannii*, as well as in other species of this genus [54, 71, 72]. Touchon *et al.* found that temperate phages account for a great proportion of *Acinetobacter*'s genome identifying over 260 prophages among the genomes in their study [54]. It is well known that phages play a crucial role in HGT as well as in the evolution and dynamics of bacterial genomes [54, 73]. There are multiple descriptions of phage related genes, cryptic prophages and prophage structures in *Acinetobacter* sp. [54, 71, 72, 74]. However, the role of phages in *Acinetobacter* is poorly understood. We

have identified two intact phages and other phages related sequences within Aj2199 genome, supporting the general idea that phages impact in the evolution of bacterial genomes.

To the best of our knowledge, RNA regulatory sequences have not yet been identified in *A. johnsonii*. Only one article has addressed the role of regulatory RNAs in *Acinetobacter* specifically *A. baylyi* [75]. In that manuscript the Aar RNA regulator was described, which is an RNA element involved in amino acid metabolism [75]. Noteworthy, *A. johnsonii* Aj2199 also has a putative Aar regulator along with several other regulatory elements. In addition, it encodes the ALIL regulatory RNA, which we found within the second most abundant IS distributed in *A. johnsonii* Aj2199 genome. Future studies to address its function(s) will be conducted.

The great number of MGEs in the Aj2199 genome suggests a direct impact in the evolution and adaptability of this strain to extreme environment due to the fact that it showed an increasing number of antibiotic resistance determinants within its genome.

The data presented here strongly suggested that *A. johnsonii* actively acquires exogenous DNA from other bacterial species and concomitantly becomes a reservoir of resistance genes.

## Supporting Information

**S1 Table. Strains sequences analyzed in this study.**

(XLSX)

**S2 Table. List of homologous genes exclusively found in *A. johnsonii* genomes when comparing with the other *Acinetobacter* genomes (see [S1 Table](#) for a complete list of genomes used). GO term is added next to each gene family as functional annotation. Contig and position of each Aj2199 specific gene is also indicated.**

(XLSX)

**S3 Table. List of gene potentially found in *A. johnsonii* AJ2199 plasmids according to plasmidSPAdes software prediction.**

(XLSX)

**S4 Table. Two-way average nucleotide identity (Two-way ANI) estimated among closely related strains of the *Acinetobacter* sp. AJ2199.**

(XLSX)

## Acknowledgments

We want to acknowledge the Argentinian Consortium of Genomic Technology (ACGT), which is funded by the PPL project of the Science, Technology, and Productive Innovation office (Mincyt) Argentina AECID A1/041041/11, D/024562/09, and INTA, for technical support.

## Author Contributions

**Conceptualization:** MSR SM GMT AI.

**Data curation:** MSR SM GMT AI KC.

**Formal analysis:** MSR SM GMT AI KC CQ GPDN.

**Funding acquisition:** MSR KC MET.

**Investigation:** SM KC GMT AI CQ GPDN MSR.

**Methodology:** SM KC STJS MA CB CV MSR.

**Project administration:** MSR.

**Resources:** MSR MET KC.

**Software:** GMT AI SM MSR KC CQ GDP.

**Supervision:** MSR.

**Writing – original draft:** SM KC GMT AI CQ MSR.

**Writing – review & editing:** SM KC GMT AI MSR MET CB MA.

## References

1. Karah N, Haldorsen B, Hegstad K, Simonsen GS, Sundsfjord A, Samuelsen O, et al. Species identification and molecular characterization of *Acinetobacter* spp. blood culture isolates from Norway. The Journal of antimicrobial chemotherapy. 2011; 66(4):738–44. doi: [10.1093/jac/dkq521](https://doi.org/10.1093/jac/dkq521) PMID: [21393175](https://pubmed.ncbi.nlm.nih.gov/21393175/).
2. Sousa C, Botelho J, Silva L, Grosso F, Nemec A, Lopes J, et al. MALDI-TOF MS and chemometric based identification of the *Acinetobacter calcoaceticus*-*Acinetobacter baumannii* complex species. International journal of medical microbiology: IJMM. 2014; 304(5–6):669–77. doi: [10.1016/j.ijmm.2014.04.014](https://doi.org/10.1016/j.ijmm.2014.04.014) PMID: [24877727](https://pubmed.ncbi.nlm.nih.gov/24877727/).
3. Sousa C, Silva L, Grosso F, Nemec A, Lopes J, Peixe L. Discrimination of the *Acinetobacter calcoaceticus*-*Acinetobacter baumannii* complex species by Fourier transform infrared spectroscopy. European journal of clinical microbiology & infectious diseases: official publication of the European Society of Clinical Microbiology. 2014; 33(8):1345–53. doi: [10.1007/s10096-014-2078-y](https://doi.org/10.1007/s10096-014-2078-y) PMID: [24563251](https://pubmed.ncbi.nlm.nih.gov/24563251/).
4. Turton JF, Shah J, Ozongwu C, Pike R. Incidence of *Acinetobacter* species other than *A. baumannii* among clinical isolates of *Acinetobacter*: evidence for emerging species. Journal of clinical microbiology. 2010; 48(4):1445–9. doi: [10.1128/JCM.02467-09](https://doi.org/10.1128/JCM.02467-09) PMID: [20181894](https://pubmed.ncbi.nlm.nih.gov/20181894/); PubMed Central PMCID: PMC2849580.
5. van den Broek PJ, van der Reijden TJ, van Strijen E, Helmig-Schurter AV, Bernards AT, Dijkshoorn L. Endemic and epidemic *acinetobacter* species in a university hospital: an 8-year survey. Journal of clinical microbiology. 2009; 47(11):3593–9. doi: [10.1128/JCM.00967-09](https://doi.org/10.1128/JCM.00967-09) PMID: [19794057](https://pubmed.ncbi.nlm.nih.gov/19794057/); PubMed Central PMCID: PMC2772585.
6. Traglia GM, Almuzara M, Vilacoba E, Tuduri A, Neumann G, Pallone E, et al. Bacteremia caused by an *Acinetobacter junii* strain harboring class 1 integron and diverse DNA mobile elements. Journal of infection in developing countries. 2014; 8(5):666–9. doi: [10.3855/jidc.3747](https://doi.org/10.3855/jidc.3747) PMID: [24820473](https://pubmed.ncbi.nlm.nih.gov/24820473/).
7. Krizova L, Maixnerova M, Sedo O, Nemec A. *Acinetobacter albensis* sp. nov., isolated from natural soil and water ecosystems. Int J Syst Evol Microbiol. 2015. doi: [10.1099/ijsem.0.000511](https://doi.org/10.1099/ijsem.0.000511) PMID: [26245775](https://pubmed.ncbi.nlm.nih.gov/26245775/).
8. Krizova L, McGinnis J, Maixnerova M, Nemec M, Poirel L, Mingle L, et al. *Acinetobacter variabilis* sp. nov. (formerly DNA group 15 sensu Tjernberg & Ursing), isolated from humans and animals. Int J Syst Evol Microbiol. 2015; 65(Pt 3):857–63. doi: [10.1099/ijms.0.000028](https://doi.org/10.1099/ijms.0.000028) PMID: [25510976](https://pubmed.ncbi.nlm.nih.gov/25510976/).
9. Guardabassi L, Dalsgaard A, Olsen JE. Phenotypic characterization and antibiotic resistance of *Acinetobacter* spp. isolated from aquatic sources. J Appl Microbiol. 1999; 87(5):659–67. PMID: [10594705](https://pubmed.ncbi.nlm.nih.gov/10594705/).
10. Seifert H, Dijkshoorn L, Gerner-Smidt P, Pelzer N, Tjernberg I, Vanechoutte M. Distribution of *Acinetobacter* species on human skin: comparison of phenotypic and genotypic identification methods. Journal of clinical microbiology. 1997; 35(11):2819–25. PMID: [9350741](https://pubmed.ncbi.nlm.nih.gov/9350741/); PubMed Central PMCID: PMC230069.
11. Seifert H, Strate A, Schulze A, Pulverer G. Vascular catheter-related bloodstream infection due to *Acinetobacter johnsonii* (formerly *Acinetobacter calcoaceticus* var. *lwoffii*): report of 13 cases. Clin Infect Dis. 1993; 17(4):632–6. PMID: [8268343](https://pubmed.ncbi.nlm.nih.gov/8268343/).
12. Rodriguez CH, Nastro M, Dabos L, Barberis C, Vay C, Famiglietti A. First isolation of *Acinetobacter johnsonii* co-producing PER-2 and OXA-58 beta-lactamases. Diagn Microbiol Infect Dis. 2014; 80(4):341–2. doi: [10.1016/j.diagmicrobio.2014.09.013](https://doi.org/10.1016/j.diagmicrobio.2014.09.013) PMID: [25294301](https://pubmed.ncbi.nlm.nih.gov/25294301/).
13. Espinal P, Roca I, Vila J. Clinical impact and molecular basis of antimicrobial resistance in *non-baumannii* *Acinetobacter*. Future Microbiol. 2011; 6(5):495–511. doi: [10.2217/fmb.11.30](https://doi.org/10.2217/fmb.11.30) PMID: [21585259](https://pubmed.ncbi.nlm.nih.gov/21585259/).
14. Bankevich A, Nurk S, Antipov D, Gurevich AA, Dvorkin M, Kulikov AS, et al. SPAdes: a new genome assembly algorithm and its applications to single-cell sequencing. J Comput Biol. 2012; 19(5):455–77. doi: [10.1089/cmb.2012.0021](https://doi.org/10.1089/cmb.2012.0021) PMID: [22506599](https://pubmed.ncbi.nlm.nih.gov/22506599/); PubMed Central PMCID: PMC3342519.
15. Zerbino DR, Birney E. Velvet: algorithms for de novo short read assembly using de Bruijn graphs. Genome Res. 2008; 18(5):821–9. doi: [10.1101/gr.074492.107](https://doi.org/10.1101/gr.074492.107) PMID: [18349386](https://pubmed.ncbi.nlm.nih.gov/18349386/); PubMed Central PMCID: PMC2336801.



16. Aziz RK, Bartels D, Best AA, DeJongh M, Disz T, Edwards RA, et al. The RAST Server: rapid annotations using subsystems technology. *BMC Genomics*. 2008; 9:75. doi: [10.1186/1471-2164-9-75](https://doi.org/10.1186/1471-2164-9-75) PMID: [18261238](https://pubmed.ncbi.nlm.nih.gov/18261238/); PubMed Central PMCID: PMC2265698.
17. Lowe TM, Eddy SR. tRNAscan-SE: a program for improved detection of transfer RNA genes in genomic sequence. *Nucleic Acids Res*. 1997; 25(5):955–64. PMID: [9023104](https://pubmed.ncbi.nlm.nih.gov/9023104/); PubMed Central PMCID: PMC146525.
18. Overbeek R, Olson R, Pusch GD, Olsen GJ, Davis JJ, Disz T, et al. The SEED and the Rapid Annotation of microbial genomes using Subsystems Technology (RAST). *Nucleic Acids Res*. 2014; 42(Database issue):D206–14. doi: [10.1093/nar/gkt1226](https://doi.org/10.1093/nar/gkt1226) PMID: [24293654](https://pubmed.ncbi.nlm.nih.gov/24293654/); PubMed Central PMCID: PMC3965101.
19. Huerta-Cepas J, Szklarczyk D, Forslund K, Cook H, Heller D, Walter MC, et al. eggNOG 4.5: a hierarchical orthology framework with improved functional annotations for eukaryotic, prokaryotic and viral sequences. *Nucleic Acids Res*. 2016; 44(D1):D286–93. doi: [10.1093/nar/gkv1248](https://doi.org/10.1093/nar/gkv1248) PMID: [26582926](https://pubmed.ncbi.nlm.nih.gov/26582926/); PubMed Central PMCID: PMC4702882.
20. Li L, Stoeckert CJ Jr., Roos DS. OrthoMCL: identification of ortholog groups for eukaryotic genomes. *Genome Res*. 2003; 13(9):2178–89. doi: [10.1101/gr.1224503](https://doi.org/10.1101/gr.1224503) PMID: [12952885](https://pubmed.ncbi.nlm.nih.gov/12952885/); PubMed Central PMCID: PMC403725.
21. Contreras-Moreira B, Vinuesa P. GET\_HOMOLOGUES, a versatile software package for scalable and robust microbial pangenome analysis. *Appl Environ Microbiol*. 2013; 79(24):7696–701. doi: [10.1128/AEM.02411-13](https://doi.org/10.1128/AEM.02411-13) PMID: [24096415](https://pubmed.ncbi.nlm.nih.gov/24096415/); PubMed Central PMCID: PMC3837814.
22. Sievers F, Wilm A, Dineen D, Gibson TJ, Karplus K, Li W, et al. Fast, scalable generation of high-quality protein multiple sequence alignments using Clustal Omega. *Mol Syst Biol*. 2011; 7:539. doi: [10.1038/msb.2011.75](https://doi.org/10.1038/msb.2011.75) PMID: [21988835](https://pubmed.ncbi.nlm.nih.gov/21988835/); PubMed Central PMCID: PMC3261699.
23. Guindon S, Gascuel O. A simple, fast, and accurate algorithm to estimate large phylogenies by maximum likelihood. *Syst Biol*. 2003; 52(5):696–704. PMID: [14530136](https://pubmed.ncbi.nlm.nih.gov/14530136/).
24. Guindon S, Dufayard JF, Lefort V, Anisimova M, Hordijk W, Gascuel O. New algorithms and methods to estimate maximum-likelihood phylogenies: assessing the performance of PhyML 3.0. *Syst Biol*. 2010; 59(3):307–21. doi: [10.1093/sysbio/syq010](https://doi.org/10.1093/sysbio/syq010) PMID: [20525638](https://pubmed.ncbi.nlm.nih.gov/20525638/).
25. Sukumaran J, Holder MT. DendroPy: a Python library for phylogenetic computing. *Bioinformatics*. 2010; 26(12):1569–71. doi: [10.1093/bioinformatics/btq228](https://doi.org/10.1093/bioinformatics/btq228) PMID: [20421198](https://pubmed.ncbi.nlm.nih.gov/20421198/).
26. Goris J, Konstantinidis KT, Klappenbach JA, Coenye T, Vandamme P, Tiedje JM. DNA-DNA hybridization values and their relationship to whole-genome sequence similarities. *Int J Syst Evol Microbiol*. 2007; 57(Pt 1):81–91. doi: [10.1099/ijs.0.64483-0](https://doi.org/10.1099/ijs.0.64483-0) PMID: [17220447](https://pubmed.ncbi.nlm.nih.gov/17220447/).
27. Gupta SK, Padmanabhan BR, Diene SM, Lopez-Rojas R, Kempf M, Landraud L, et al. ARG-ANNOT, a new bioinformatic tool to discover antibiotic resistance genes in bacterial genomes. *Antimicrobial agents and chemotherapy*. 2014; 58(1):212–20. doi: [10.1128/AAC.01310-13](https://doi.org/10.1128/AAC.01310-13) PMID: [24145532](https://pubmed.ncbi.nlm.nih.gov/24145532/); PubMed Central PMCID: PMC3910750.
28. Siguier P, Perochon J, Lestrade L, Mahillon J, Chandler M. ISfinder: the reference centre for bacterial insertion sequences. *Nucleic Acids Res*. 2006; 34(Database issue):D32–6. doi: [10.1093/nar/gkj014](https://doi.org/10.1093/nar/gkj014) PMID: [16381877](https://pubmed.ncbi.nlm.nih.gov/16381877/); PubMed Central PMCID: PMC1347377.
29. Zhou Y, Liang Y, Lynch KH, Dennis JJ, Wishart DS. PFAST: a fast phage search tool. *Nucleic Acids Res*. 2011; 39(Web Server issue):W347–52. doi: [10.1093/nar/gkr485](https://doi.org/10.1093/nar/gkr485) PMID: [21672955](https://pubmed.ncbi.nlm.nih.gov/21672955/); PubMed Central PMCID: PMC3125810.
30. Carattoli A, Zankari E, Garcia-Fernandez A, Voldby Larsen M, Lund O, Villa L, et al. In silico detection and typing of plasmids using PlasmidFinder and plasmid multilocus sequence typing. *Antimicrobial agents and chemotherapy*. 2014; 58(7):3895–903. doi: [10.1128/AAC.02412-14](https://doi.org/10.1128/AAC.02412-14) PMID: [24777092](https://pubmed.ncbi.nlm.nih.gov/24777092/); PubMed Central PMCID: PMC4068535.
31. Antipov Dmitry H N, Shen Max, Raiko Mikhail, La Alla, Pevzner PA. plasmidSPAdes: Assembling Plasmids from Whole Genome Sequencing Data. *bioRxiv*. 2016:1–7.
32. Nawrocki EP, Eddy SR. Infernal 1.1: 100-fold faster RNA homology searches. *Bioinformatics*. 2013; 29(22):2933–5. doi: [10.1093/bioinformatics/btt509](https://doi.org/10.1093/bioinformatics/btt509) PMID: [24008419](https://pubmed.ncbi.nlm.nih.gov/24008419/); PubMed Central PMCID: PMC3810854.
33. Poirel L, Figueiredo S, Cattoir V, Carattoli A, Nordmann P. *Acinetobacter radioresistens* as a silent source of carbapenem resistance for *Acinetobacter* spp. *Antimicrobial agents and chemotherapy*. 2008; 52(4):1252–6. doi: [10.1128/AAC.01304-07](https://doi.org/10.1128/AAC.01304-07) PMID: [18195058](https://pubmed.ncbi.nlm.nih.gov/18195058/); PubMed Central PMCID: PMC2292503.
34. Tolmasky ME, Crosa JH. Molecular cloning and expression of genetic determinants for the iron uptake system mediated by the *Vibrio anguillarum* plasmid pJM1. *J Bacteriol*. 1984; 160(3):860–6. PMID: [6094511](https://pubmed.ncbi.nlm.nih.gov/6094511/); PubMed Central PMCID: PMC4702882.

35. Ramirez MS, Don M, Merkier AK, Bistue AJ, Zorreguieta A, Centron D, et al. Naturally competent *Acinetobacter baumannii* clinical isolate as a convenient model for genetic studies. *Journal of clinical microbiology*. 2010; 48(4):1488–90. doi: [10.1128/JCM.01264-09](https://doi.org/10.1128/JCM.01264-09) PMID: [20181905](https://pubmed.ncbi.nlm.nih.gov/20181905/); PubMed Central PMCID: [PMC2849597](https://pubmed.ncbi.nlm.nih.gov/PMC/PMC2849597/).
36. Yildirim S, Thompson MG, Jacobs AC, Zurawski DV, Kirkup BC. Evaluation of Parameters for High Efficiency Transformation of *Acinetobacter baumannii*. *Sci Rep*. 2016; 6:22110. doi: [10.1038/srep22110](https://doi.org/10.1038/srep22110) PMID: [26911658](https://pubmed.ncbi.nlm.nih.gov/26911658/); PubMed Central PMCID: [PMC4766488](https://pubmed.ncbi.nlm.nih.gov/PMC/PMC4766488/).
37. Perichon B, Goussard S, Walewski V, Krizova L, Cerqueira G, Murphy C, et al. Identification of 50 class D beta-lactamases and 65 *Acinetobacter*-derived cephalosporinases in *Acinetobacter spp.* *Antimicrobial agents and chemotherapy*. 2014; 58(2):936–49. doi: [10.1128/AAC.01261-13](https://doi.org/10.1128/AAC.01261-13) PMID: [24277043](https://pubmed.ncbi.nlm.nih.gov/24277043/); PubMed Central PMCID: [PMC3910822](https://pubmed.ncbi.nlm.nih.gov/PMC/PMC3910822/).
38. Iacono M, Villa L, Fortini D, Bordoni R, Imperi F, Bonnal RJ, et al. Whole-genome pyrosequencing of an epidemic multidrug-resistant *Acinetobacter baumannii* strain belonging to the European clone II group. *Antimicrobial agents and chemotherapy*. 2008; 52(7):2616–25. doi: [10.1128/AAC.01643-07](https://doi.org/10.1128/AAC.01643-07) PMID: [18411315](https://pubmed.ncbi.nlm.nih.gov/18411315/); PubMed Central PMCID: [PMC2443898](https://pubmed.ncbi.nlm.nih.gov/PMC/PMC2443898/).
39. Poirel L, Nordmann P. Genetic structures at the origin of acquisition and expression of the carbapenem-hydrolyzing oxacillinase gene *bla*<sub>OXA-58</sub> in *Acinetobacter baumannii*. *Antimicrobial agents and chemotherapy*. 2006; 50(4):1442–8. doi: [10.1128/AAC.50.4.1442-1448.2006](https://doi.org/10.1128/AAC.50.4.1442-1448.2006) PMID: [16569863](https://pubmed.ncbi.nlm.nih.gov/16569863/); PubMed Central PMCID: [PMC1426978](https://pubmed.ncbi.nlm.nih.gov/PMC/PMC1426978/).
40. Fu Y, Jiang J, Zhou H, Jiang Y, Fu Y, Yu Y, et al. Characterization of a novel plasmid type and various genetic contexts of *bla*<sub>OXA-58</sub> in *Acinetobacter spp.* from multiple cities in China. *PloS one*. 2014; 9(1): e84680. doi: [10.1371/journal.pone.0084680](https://doi.org/10.1371/journal.pone.0084680) PMID: [24400107](https://pubmed.ncbi.nlm.nih.gov/24400107/); PubMed Central PMCID: [PMC3882262](https://pubmed.ncbi.nlm.nih.gov/PMC/PMC3882262/).
41. Chiou CS, Jones AL. Nucleotide sequence analysis of a transposon (Tn5393) carrying streptomycin resistance genes in *Erwinia amylovora* and other gram-negative bacteria. *J Bacteriol*. 1993; 175(3):732–40. PMID: [8380801](https://pubmed.ncbi.nlm.nih.gov/8380801/); PubMed Central PMCID: [PMC196212](https://pubmed.ncbi.nlm.nih.gov/PMC/PMC196212/).
42. Ravasi P, Limansky AS, Rodriguez RE, Viale AM, Mussi MA. ISAb825, a functional insertion sequence modulating genomic plasticity and *bla*<sub>(OXA-58)</sub> expression in *Acinetobacter baumannii*. *Antimicrobial agents and chemotherapy*. 2011; 55(2):917–20. doi: [10.1128/AAC.00491-10](https://doi.org/10.1128/AAC.00491-10) PMID: [21098239](https://pubmed.ncbi.nlm.nih.gov/21098239/); PubMed Central PMCID: [PMC3028783](https://pubmed.ncbi.nlm.nih.gov/PMC/PMC3028783/).
43. Zarrilli R, Vitale D, Di Popolo A, Bagattini M, Daoud Z, Khan AU, et al. A plasmid-borne *bla*<sub>OXA-58</sub> gene confers imipenem resistance to *Acinetobacter baumannii* isolates from a Lebanese hospital. *Antimicrobial agents and chemotherapy*. 2008; 52(11):4115–20. doi: [10.1128/AAC.00366-08](https://doi.org/10.1128/AAC.00366-08) PMID: [18725447](https://pubmed.ncbi.nlm.nih.gov/18725447/); PubMed Central PMCID: [PMC2573143](https://pubmed.ncbi.nlm.nih.gov/PMC/PMC2573143/).
44. Di Nocera PP, Rocco F, Giannouli M, Triassi M, Zarrilli R. Genome organization of epidemic *Acinetobacter baumannii* strains. *BMC Microbiol*. 2011; 11:224. doi: [10.1186/1471-2180-11-224](https://doi.org/10.1186/1471-2180-11-224) PMID: [21985032](https://pubmed.ncbi.nlm.nih.gov/21985032/); PubMed Central PMCID: [PMC3224125](https://pubmed.ncbi.nlm.nih.gov/PMC/PMC3224125/).
45. Bailey JK, Pinyon JL, Anantham S, Hall RM. Distribution of the *bla*<sub>TEM</sub> gene and *bla*<sub>TEM</sub>-containing transposons in commensal *Escherichia coli*. *The Journal of antimicrobial chemotherapy*. 2011; 66(4):745–51. doi: [10.1093/jac/dkq529](https://doi.org/10.1093/jac/dkq529) PMID: [21393132](https://pubmed.ncbi.nlm.nih.gov/21393132/).
46. Hare JM, Bradley JA, Lin CL, Elam TJ. Diverse responses to UV light exposure in *Acinetobacter* include the capacity for DNA damage-induced mutagenesis in the opportunistic pathogens *Acinetobacter baumannii* and *Acinetobacter ursingii*. *Microbiology*. 2012; 158(Pt 3):601–11. doi: [10.1099/mic.0.054668-0](https://doi.org/10.1099/mic.0.054668-0) PMID: [22117008](https://pubmed.ncbi.nlm.nih.gov/22117008/); PubMed Central PMCID: [PMC3352118](https://pubmed.ncbi.nlm.nih.gov/PMC/PMC3352118/).
47. Rapa RA, Islam A, Monahan LG, Mutreja A, Thomson N, Charles IG, et al. A genomic island integrated into *recA* of *Vibrio cholerae* contains a divergent *recA* and provides multi-pathway protection from DNA damage. *Environ Microbiol*. 2015; 17(4):1090–102. doi: [10.1111/1462-2920.12512](https://doi.org/10.1111/1462-2920.12512) PMID: [24889424](https://pubmed.ncbi.nlm.nih.gov/24889424/); PubMed Central PMCID: [PMC4405046](https://pubmed.ncbi.nlm.nih.gov/PMC/PMC4405046/).
48. Liebert CA, Hall RM, Summers AO. Transposon Tn21, flagship of the floating genome. *Microbiol Mol Biol Rev*. 1999; 63(3):507–22. PMID: [10477306](https://pubmed.ncbi.nlm.nih.gov/10477306/); PubMed Central PMCID: [PMC103744](https://pubmed.ncbi.nlm.nih.gov/PMC/PMC103744/).
49. Power P, Di Conza J, Rodriguez MM, Ghiglione B, Ayala JA, Casellas JM, et al. Biochemical characterization of PER-2 and genetic environment of *bla*<sub>PER-2</sub>. *Antimicrobial agents and chemotherapy*. 2007; 51(7):2359–65. doi: [10.1128/AAC.01395-06](https://doi.org/10.1128/AAC.01395-06) PMID: [17438050](https://pubmed.ncbi.nlm.nih.gov/17438050/); PubMed Central PMCID: [PMC1913245](https://pubmed.ncbi.nlm.nih.gov/PMC/PMC1913245/).
50. Feng Y, Yang P, Wang X, Zong Z. Characterization of *Acinetobacter johnsonii* isolate XBB1 carrying nine plasmids and encoding NDM-1, OXA-58 and PER-1 by genome sequencing. *The Journal of antimicrobial chemotherapy*. 2016; 71(1):71–5. doi: [10.1093/jac/dkv324](https://doi.org/10.1093/jac/dkv324) PMID: [26462992](https://pubmed.ncbi.nlm.nih.gov/26462992/).
51. Zong Z. The complex genetic context of *bla*<sub>PER-1</sub> flanked by miniature inverted-repeat transposable elements in *Acinetobacter johnsonii*. *PloS one*. 2014; 9(2):e90046. doi: [10.1371/journal.pone.0090046](https://doi.org/10.1371/journal.pone.0090046) PMID: [24587208](https://pubmed.ncbi.nlm.nih.gov/24587208/); PubMed Central PMCID: [PMC3934969](https://pubmed.ncbi.nlm.nih.gov/PMC/PMC3934969/).

52. Basmaci R, Bidet P, Bercot B, Jost C, Kwon T, Gaumetou E, et al. First identification of a chromosomally located penicillinase gene in *Kingella kingae* species isolated in continental Europe. *Antimicrobial agents and chemotherapy*. 2014; 58(10):6258–9. doi: [10.1128/AAC.03562-14](https://doi.org/10.1128/AAC.03562-14) PMID: [25049250](https://pubmed.ncbi.nlm.nih.gov/25049250/); PubMed Central PMCID: [PMCPMC4187927](https://pubmed.ncbi.nlm.nih.gov/PMC4187927/).
53. Fehlberg LC, da Silva Nogueira K, Cayo da Silva R, Nicoletti AG, Palmeiro JK, Gales AC, et al. Detection of PER-2-producing *Enterobacter cloacae* in a Brazilian liver transplantation unit. *Antimicrobial agents and chemotherapy*. 2014; 58(3):1831–2. doi: [10.1128/AAC.01260-13](https://doi.org/10.1128/AAC.01260-13) PMID: [24449769](https://pubmed.ncbi.nlm.nih.gov/24449769/); PubMed Central PMCID: [PMCPMC3957881](https://pubmed.ncbi.nlm.nih.gov/PMC3957881/).
54. Touchon M, Cury J, Yoon EJ, Krizova L, Cerqueira GC, Murphy C, et al. The genomic diversification of the whole *Acinetobacter* genus: origins, mechanisms, and consequences. *Genome Biol Evol*. 2014; 6(10):2866–82. doi: [10.1093/gbe/evu225](https://doi.org/10.1093/gbe/evu225) PMID: [25313016](https://pubmed.ncbi.nlm.nih.gov/25313016/); PubMed Central PMCID: [PMCPMC4224351](https://pubmed.ncbi.nlm.nih.gov/PMC4224351/).
55. Park BS, Song DH, Kim HM, Choi BS, Lee H, Lee JO. The structural basis of lipopolysaccharide recognition by the TLR4-MD-2 complex. *Nature*. 2009; 458(7242):1191–5. doi: [10.1038/nature07830](https://doi.org/10.1038/nature07830) PMID: [19252480](https://pubmed.ncbi.nlm.nih.gov/19252480/).
56. Yamamoto M, Akira S. Lipid A receptor TLR4-mediated signaling pathways. *Adv Exp Med Biol*. 2010; 667:59–68. doi: [10.1007/978-1-4419-1603-7\\_6](https://doi.org/10.1007/978-1-4419-1603-7_6) PMID: [20665200](https://pubmed.ncbi.nlm.nih.gov/20665200/).
57. Zimble DL, Arivett BA, Beckett AC, Menke SM, Actis LA. Functional features of TonB energy transduction systems of *Acinetobacter baumannii*. *Infect Immun*. 2013; 81(9):3382–94. doi: [10.1128/IAI.00540-13](https://doi.org/10.1128/IAI.00540-13) PMID: [23817614](https://pubmed.ncbi.nlm.nih.gov/23817614/); PubMed Central PMCID: [PMCPMC3754232](https://pubmed.ncbi.nlm.nih.gov/PMC3754232/).
58. Cho BK, Kim D, Knight EM, Zengler K, Palsson BO. Genome-scale reconstruction of the sigma factor network in *Escherichia coli*: topology and functional states. *BMC Biol*. 2014; 12:4. doi: [10.1186/1741-7007-12-4](https://doi.org/10.1186/1741-7007-12-4) PMID: [24461193](https://pubmed.ncbi.nlm.nih.gov/24461193/); PubMed Central PMCID: [PMCPMC3923258](https://pubmed.ncbi.nlm.nih.gov/PMC3923258/).
59. Mammeri H, Poirel L, Mangeney N, Nordmann P. Chromosomal integration of a cephalosporinase gene from *Acinetobacter baumannii* into *Oligella urethralis* as a source of acquired resistance to beta-lactams. *Antimicrobial agents and chemotherapy*. 2003; 47(5):1536–42. PMID: [12709319](https://pubmed.ncbi.nlm.nih.gov/12709319/); PubMed Central PMCID: [PMCPMC153344](https://pubmed.ncbi.nlm.nih.gov/PMC153344/).
60. Storz G, Vogel J, Wassarman KM. Regulation by small RNAs in bacteria: expanding frontiers. *Mol Cell*. 2011; 43(6):880–91. doi: [10.1016/j.molcel.2011.08.022](https://doi.org/10.1016/j.molcel.2011.08.022) PMID: [21925377](https://pubmed.ncbi.nlm.nih.gov/21925377/); PubMed Central PMCID: [PMCPMC3176440](https://pubmed.ncbi.nlm.nih.gov/PMC3176440/).
61. Vogel J, Luisi BF. Hfq and its constellation of RNA. *Nat Rev Microbiol*. 2011; 9(8):578–89. doi: [10.1038/nrmicro2615](https://doi.org/10.1038/nrmicro2615) PMID: [21760622](https://pubmed.ncbi.nlm.nih.gov/21760622/); PubMed Central PMCID: [PMCPMC4615618](https://pubmed.ncbi.nlm.nih.gov/PMC4615618/).
62. Mazauric MH, Licznar P, Prere MF, Canal I, Fayet O. Apical loop-internal loop RNA pseudoknots: a new type of stimulator of -1 translational frameshifting in bacteria. *J Biol Chem*. 2008; 283(29):20421–32. doi: [10.1074/jbc.M802829200](https://doi.org/10.1074/jbc.M802829200) PMID: [18474594](https://pubmed.ncbi.nlm.nih.gov/18474594/).
63. Chusri S, Chongsuvivatwong V, Rivera JI, Silpajajakul K, Singkhamanan K, McNeil E, et al. Clinical outcomes of hospital-acquired infection with *Acinetobacter nosocomialis* and *Acinetobacter pittii*. *Antimicrobial agents and chemotherapy*. 2014; 58(7):4172–9. doi: [10.1128/AAC.02992-14](https://doi.org/10.1128/AAC.02992-14) PMID: [24820079](https://pubmed.ncbi.nlm.nih.gov/24820079/); PubMed Central PMCID: [PMCPMC4068534](https://pubmed.ncbi.nlm.nih.gov/PMC4068534/).
64. Endo S, Yano H, Kanamori H, Inomata S, Aoyagi T, Hatta M, et al. High frequency of *Acinetobacter soli* among *Acinetobacter* isolates causing bacteremia at a tertiary hospital in Japan. *Journal of clinical microbiology*. 2014; 52(3):911–5. doi: [10.1128/JCM.03009-13](https://doi.org/10.1128/JCM.03009-13) PMID: [24403303](https://pubmed.ncbi.nlm.nih.gov/24403303/); PubMed Central PMCID: [PMCPMC3957750](https://pubmed.ncbi.nlm.nih.gov/PMC3957750/).
65. Tsai HY, Cheng A, Liu CY, Huang YT, Lee YC, Liao CH, et al. Bacteremia caused by *Acinetobacter junii* at a medical center in Taiwan, 2000–2010. *European journal of clinical microbiology & infectious diseases: official publication of the European Society of Clinical Microbiology*. 2012; 31(10):2737–43. doi: [10.1007/s10096-012-1622-x](https://doi.org/10.1007/s10096-012-1622-x) PMID: [22562410](https://pubmed.ncbi.nlm.nih.gov/22562410/).
66. Harmer CJ, Hall RM. IS26-Mediated Precise Excision of the IS26-*aphA1* a Translocatable Unit. *MBio*. 2015; 6(6):e01866–15. doi: [10.1128/mBio.01866-15](https://doi.org/10.1128/mBio.01866-15) PMID: [26646012](https://pubmed.ncbi.nlm.nih.gov/26646012/); PubMed Central PMCID: [PMCPMC4676283](https://pubmed.ncbi.nlm.nih.gov/PMC4676283/).
67. Lopes BS, Amyes SG. Role of IS*Aba1* and IS*Aba125* in governing the expression of *bla*<sub>ADC</sub> in clinically relevant *Acinetobacter baumannii* strains resistant to cephalosporins. *J Med Microbiol*. 2012; 61(Pt 8):1103–8. doi: [10.1099/jmm.0.044156-0](https://doi.org/10.1099/jmm.0.044156-0) PMID: [22499776](https://pubmed.ncbi.nlm.nih.gov/22499776/).
68. Mugnier PD, Poirel L, Nordmann P. Functional analysis of insertion sequence IS*Aba1*, responsible for genomic plasticity of *Acinetobacter baumannii*. *J Bacteriol*. 2009; 191(7):2414–8. doi: [10.1128/JB.01258-08](https://doi.org/10.1128/JB.01258-08) PMID: [19136598](https://pubmed.ncbi.nlm.nih.gov/19136598/); PubMed Central PMCID: [PMCPMC2655512](https://pubmed.ncbi.nlm.nih.gov/PMC2655512/).
69. Roca I, Espinal P, Vila-Farres X, Vila J. The *Acinetobacter baumannii* Oxymoron: Commensal Hospital Dweller Turned Pan-Drug-Resistant Menace. *Frontiers in microbiology*. 2012; 3:148. doi: [10.3389/fmicb.2012.00148](https://doi.org/10.3389/fmicb.2012.00148) PMID: [22536199](https://pubmed.ncbi.nlm.nih.gov/22536199/); PubMed Central PMCID: [PMC3333477](https://pubmed.ncbi.nlm.nih.gov/PMC3333477/).

70. Imperi F, Antunes LC, Blom J, Villa L, Iacono M, Visca P, et al. The genomics of *Acinetobacter baumannii*: insights into genome plasticity, antimicrobial resistance and pathogenicity. *IUBMB Life*. 2011; 63(12):1068–74. doi: [10.1002/iub.531](https://doi.org/10.1002/iub.531) PMID: [22034231](https://pubmed.ncbi.nlm.nih.gov/22034231/).
71. Hare JM, Ferrell JC, Witkowski TA, Grice AN. Prophage induction and differential RecA and UmuDAB transcriptome regulation in the DNA damage responses of *Acinetobacter baumannii* and *Acinetobacter baylyi*. *PLoS one*. 2014; 9(4):e93861. doi: [10.1371/journal.pone.0093861](https://doi.org/10.1371/journal.pone.0093861) PMID: [24709747](https://pubmed.ncbi.nlm.nih.gov/24709747/); PubMed Central PMCID: PMCPMC3978071.
72. Liu Z, Ling B, Zhou L. Prevalence of 16S rRNA methylase, modifying enzyme, and extended-spectrum beta-lactamase genes among *Acinetobacter baumannii* isolates. *J Chemother*. 2015; 27(4):207–12. doi: [10.1179/1973947814Y.0000000190](https://doi.org/10.1179/1973947814Y.0000000190) PMID: [24766153](https://pubmed.ncbi.nlm.nih.gov/24766153/).
73. Menouni R, Hutinet G, Petit MA, Ansaldi M. Bacterial genome remodeling through bacteriophage recombination. *FEMS Microbiol Lett*. 2015; 362(1):1–10. doi: [10.1093/femsle/fnu022](https://doi.org/10.1093/femsle/fnu022) PMID: [25790500](https://pubmed.ncbi.nlm.nih.gov/25790500/).
74. Renda BA, Dasgupta A, Leon D, Barrick JE. Genome instability mediates the loss of key traits by *Acinetobacter baylyi* ADP1 during laboratory evolution. *J Bacteriol*. 2015; 197(5):872–81. doi: [10.1128/JB.02263-14](https://doi.org/10.1128/JB.02263-14) PMID: [25512307](https://pubmed.ncbi.nlm.nih.gov/25512307/); PubMed Central PMCID: PMCPMC4325111.
75. Schilling D, Findeiss S, Richter AS, Taylor JA, Gerischer U. The small RNA Aar in *Acinetobacter baylyi*: a putative regulator of amino acid metabolism. *Arch Microbiol*. 2010; 192(9):691–702. doi: [10.1007/s00203-010-0592-6](https://doi.org/10.1007/s00203-010-0592-6) PMID: [20559624](https://pubmed.ncbi.nlm.nih.gov/20559624/).
